# Supplementary material for: Easily-accessible fullerenol as a cathode buffer layer for inverted organic photovoltaic devices
Source: Royal Society of Chemistry journal article supplement (doi:10.1039/c4ra03045a), 2014-01-01
Supplement: c4ra03045a1.pdf [file c4ra03045a1.pdf]

## Electronic Supplementary Information

### Easy-accessible fulleranol as cathode buffer layer for inverted organic photovoltaic devices

Ning Wang<sup>a</sup>, Liang Sun<sup>a</sup>, Xiaona Zhang<sup>b</sup>, Xichang Bao<sup>a</sup>,

Wei Zheng<sup>\*,b</sup>, Renqiang Yang<sup>\*,a</sup>

<sup>a</sup>CAS Key Laboratory of Bio-based Materials, Qingdao Institute of Bioenergy and  
Bioprocess Technology, Chinese Academy of Sciences, Qingdao 266101, China. Fax:  
+86-532-80662778. Tel: +86-532-80662700. E-mail: yangrq@qibebt.ac.cn

<sup>b</sup>College of Materials Science and Engineering, Harbin University of Science and  
Technology, Harbin 150080, China. E-mail: zhengwei1972@qq.com

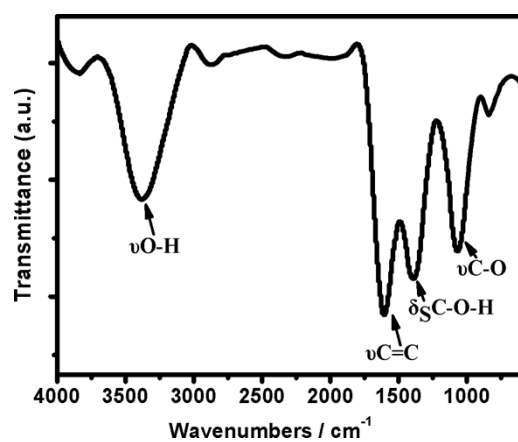

Fig. S1 FT-IR spectrum of fulleranol product

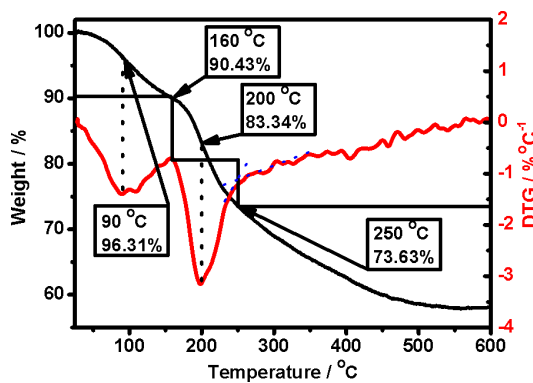

**Fig. S2** TGA curve and the differential thermo-gravimetric (DTG) curve for the fullerenol product.

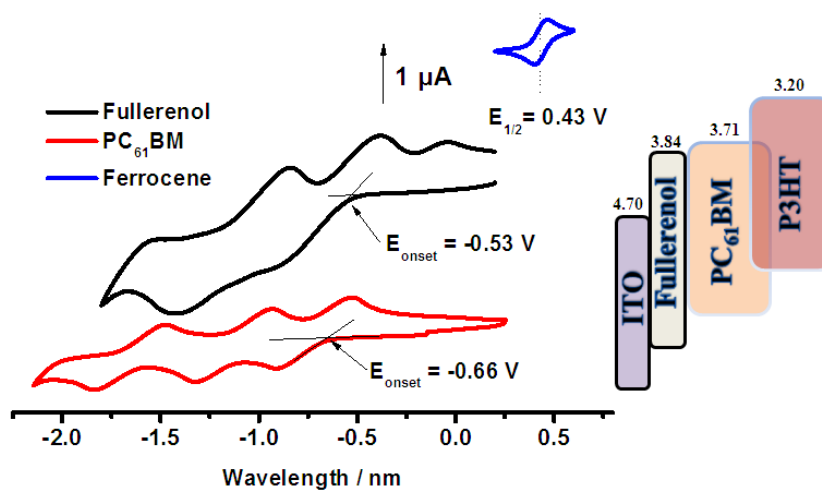

**Fig. S3** Cyclic voltammograms of fullerenol and PC<sub>61</sub>BM as thin films.

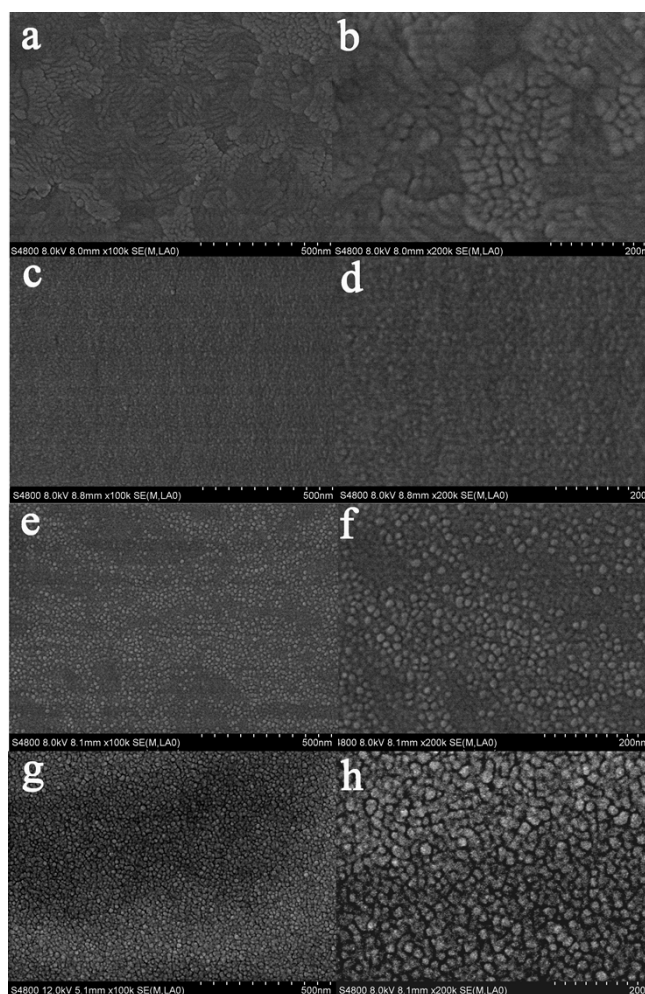

**Fig. S4** FE-SEM images of ITO glass in large scale (a) and small scale (b); FE-SEM images of fullerene-coated ITO glass annealed at 25 °C in large scale (c) and small scale (d); FE-SEM images of fullerene-coated ITO glass annealed at 160 °C in large

scale (e) and small scale (f).; FE-SEM images of ZnO coated ITO glass in large scale (g) and small scale (h).

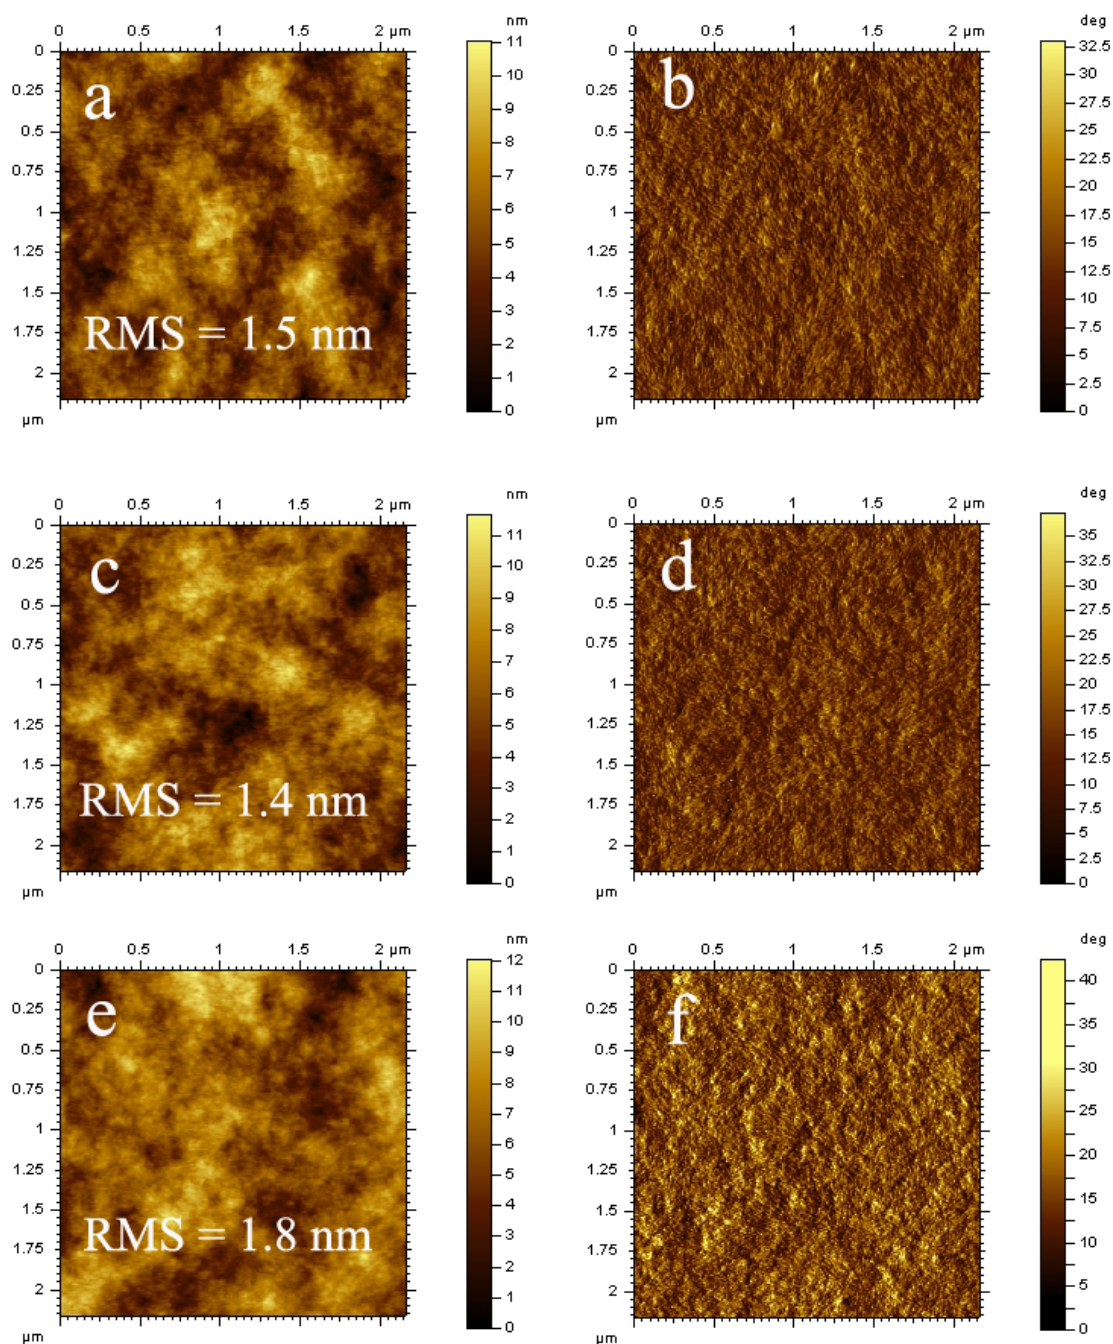

**Fig. S5** AFM height and phase images of the blend films of P3HT/PC<sub>61</sub>BM on bare ITO glass (a, b), ITO glass coated with ZnO (c, d) and fullerenol (e, f). The fullerenol film was annealing at 160 °C.

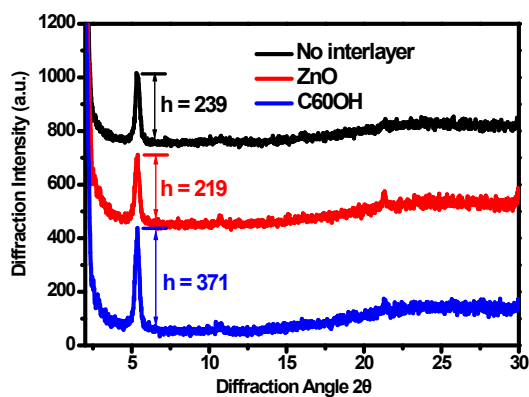

**Fig. S6** XRD spectra of the blend films of P3HT/PC<sub>61</sub>BM on bare ITO glass (black line), ITO glass coated with ZnO (red line) and C60OH (blue line). The h values in the graph represented the diffraction intensity of the blend films.

**Table S1.** Elemental analysis, secondary bond water content and average structure of the fulleranol product.

| average structure                                     | element analysis<br>(%) <sup>a</sup> | water content<br>(wt %) <sup>b</sup> |
|-------------------------------------------------------|--------------------------------------|--------------------------------------|
| C <sub>60</sub> (OH) <sub>16</sub> •6H <sub>2</sub> O | C, 67.95; H, 2.60                    | 9.57                                 |
|                                                       | (C, 65.46; H, 2.56)                  | (9.82)                               |

<sup>a</sup>Values in parentheses are calculated data.

<sup>b</sup>Water content was determined by thermogravimetric analysis.
